# Supplementary material
Source: publisher figshare collection journal article supplement (https://tandf.figshare.com/articles/dataset/_/8223827)
Supplement: Supplementary file 1 [file 1]

## Supplementary Information

Dispersal dynamics of juvenile Secretarybirds *Sagittarius serpentarius* in southern Africa  
 Melissa A Whitecross, Ernst F Retief and Hanneline A Smit-Robinson  
 Ostrich 2019, 90(2): 97–110. <https://doi.org/10.2989/00306525.2019.1581295>

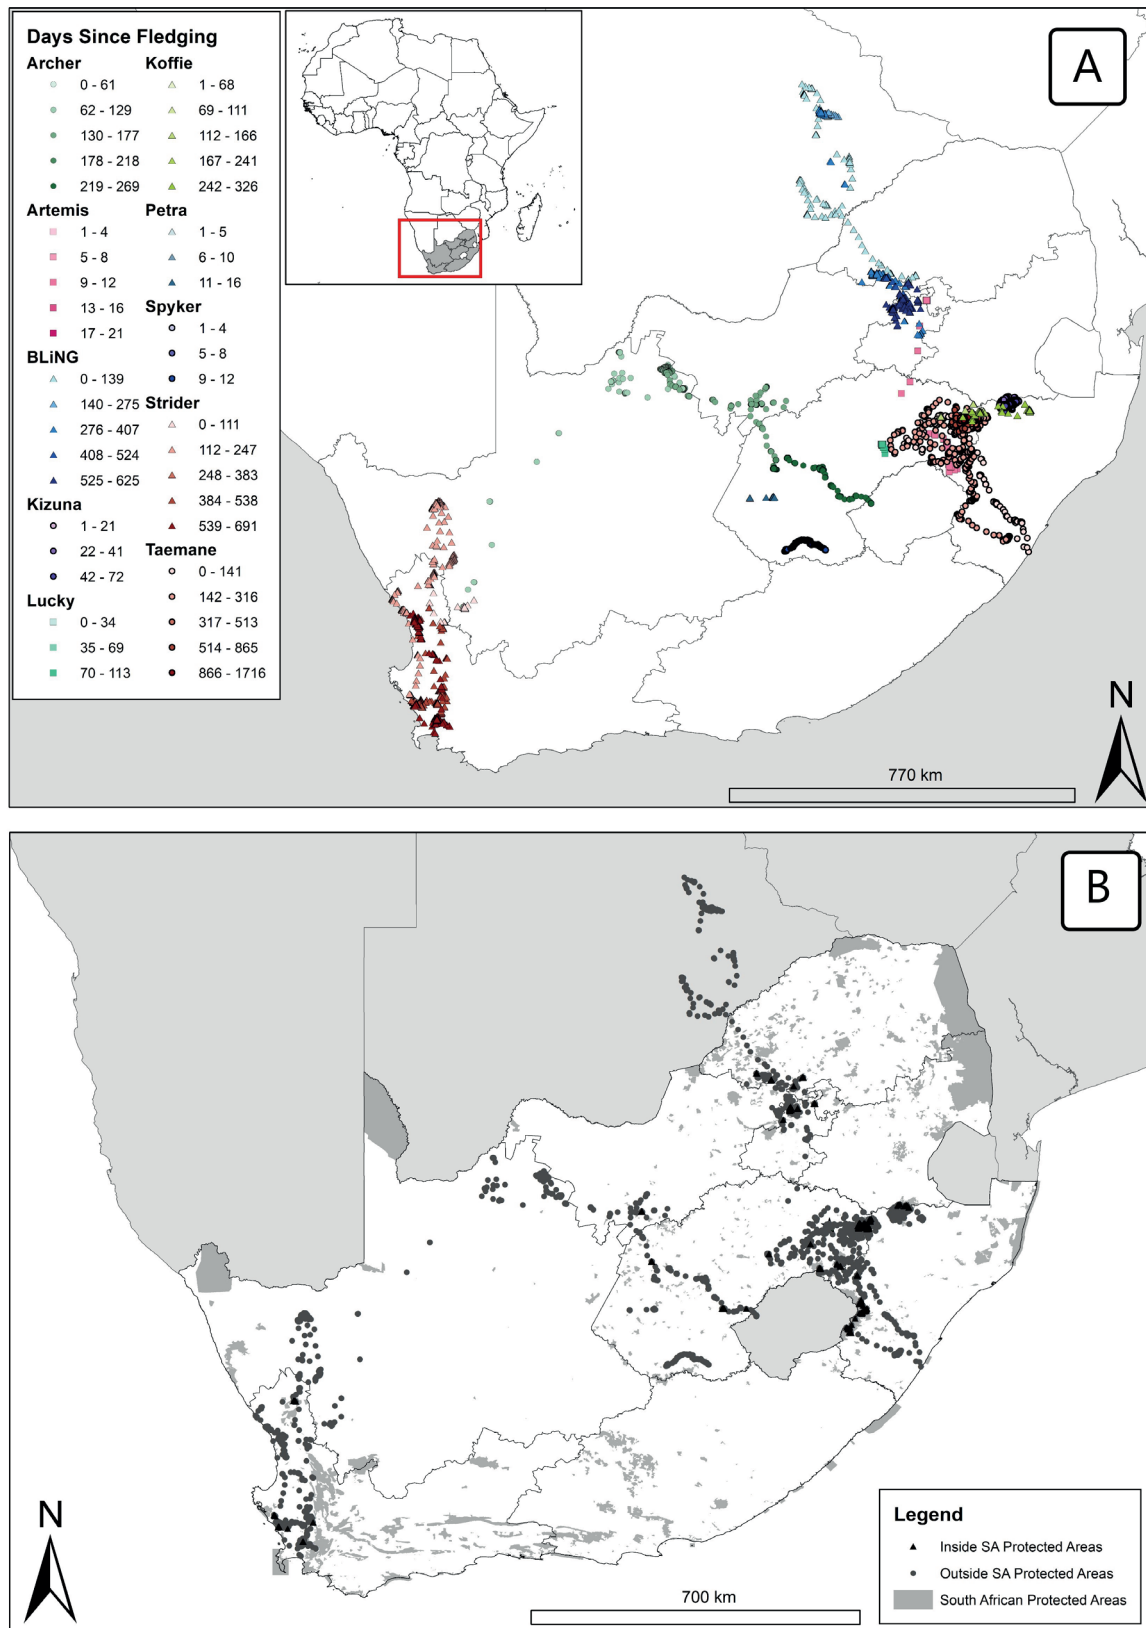

**Figure S1:** (a) A map of the recorded movements of all juvenile Secretarybirds, with colour shading indicating the number of days since fledging for each bird. (b) A map of tracking data for all birds showing which points fell within South Africa's formally protected areas (grey shading)

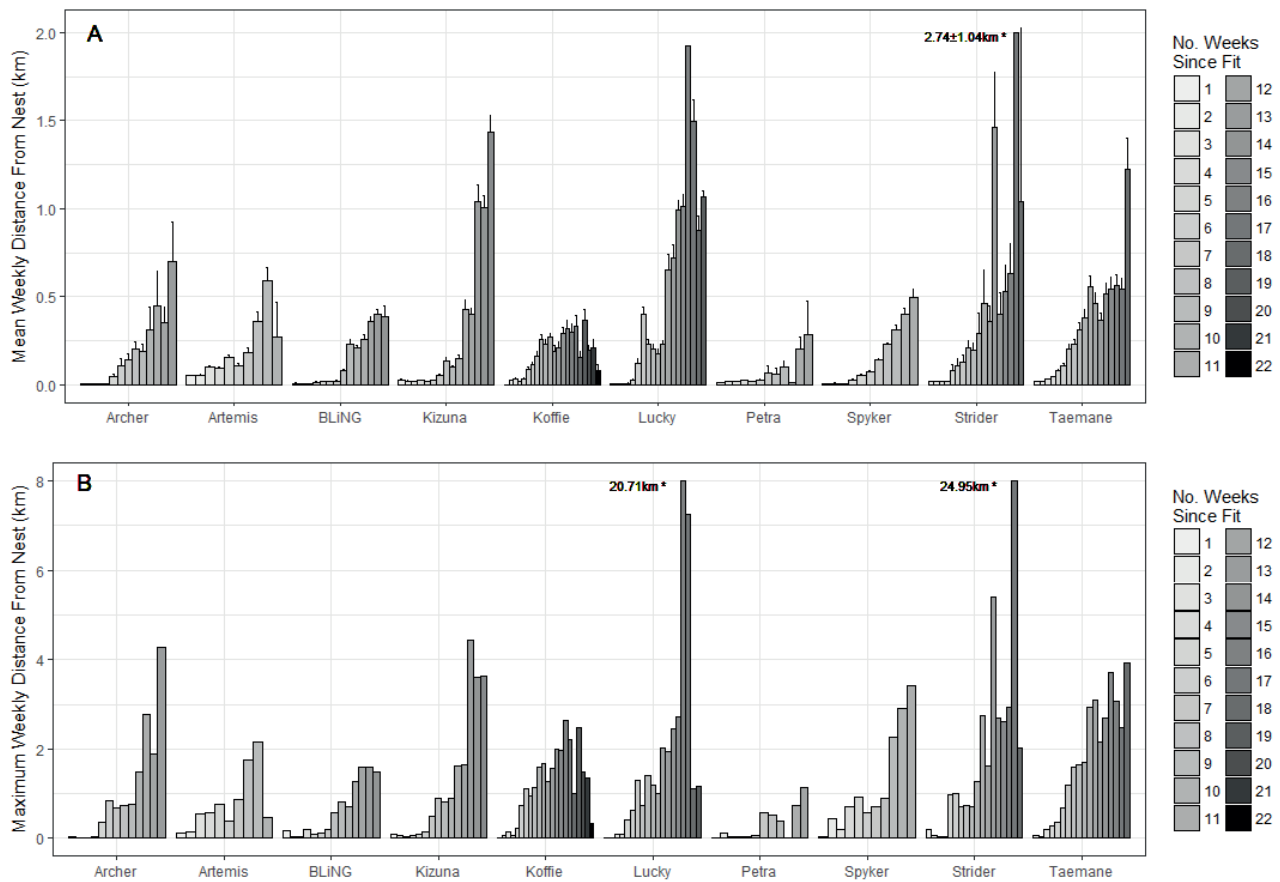

**Figure S2:** (a) Mean  $\pm$  SE and (b) maximum weekly straight-line distances recorded for each Secretarybird from the nest site during the post-fledging dispersal period (PFDP). For improved visibility of lower values, the y-scales were adjusted resulting in the cutting-off of some of the data which has been included as text next to the '\*' symbols
