# Supplementary material
Source: publisher figshare collection journal article supplement (https://tandf.figshare.com/articles/dataset/_/8223827)
Supplement: Supplementary file 2 [file 1]

## Supplementary Information

### Dispersal dynamics of juvenile Secretarybirds *Sagittarius serpentarius* in southern Africa

Melissa A Whitecross, Ernst F Retief and Hanneline A Smit-Robinson

Ostrich 2019, 90(2): 97–110. <https://doi.org/10.2989/00306525.2019.1581295>

**Table S1:** Summary of the outputs from Kolmogorov–Smirnov tests run between the mean hourly activity patterns per month for juvenile Secretarybirds during their post-fledging dispersal period (PFDP). These results correspond with Figure 3. Significant differences are shown in bold.

| Comparison         | D value | p-value          |
|--------------------|---------|------------------|
| month 1 vs month 2 | 0.67    | <b>&lt;0.001</b> |
| month 1 vs month 3 | 0.79    | <b>&lt;0.001</b> |
| month 1 vs month 4 | 1       | <b>&lt;0.001</b> |
| month 2 vs month 3 | 0.33    | 0.14             |
| month 2 vs month 4 | 0.54    | <b>0.001</b>     |
| month 3 vs month 4 | 0.46    | <b>0.01</b>      |

**Table S2:** Comparison of the mean size and time spent in temporary vs permanent foraging home ranges (HR) during the wandering and stop phases of dispersal of 10 juvenile Secretarybirds tracked in South African between 2012 and 2015. The 95% kernel density estimate (KDE) for each foraging area was calculated.

| HR type   | Name    | Total days spent in HR | Mean $\pm$ SE KDE 95% | Number of different HR | Total days in natal HR | Total days tracked |
|-----------|---------|------------------------|-----------------------|------------------------|------------------------|--------------------|
| Temporary | Archer  | 49                     | 4.34 $\pm$ 0.93       | 24                     | 86                     | 269                |
|           | Artemis | 12                     | 1.78 $\pm$ 1.02       | 7                      | 60                     | 140                |
|           | BLiNG   | 68                     | 11.59 $\pm$ 4.38      | 32                     | 95                     | 625                |
|           | Kizuna  | 1                      | 13.44 $\pm$ 0.00      | 1                      | 97                     | 491                |
|           | Koffie  | 2                      | 4.73 $\pm$ 0.00       | 1                      | 154                    | 326                |
|           | Petra   |                        |                       |                        | 94                     | 103                |
|           | Spyker  | 6                      | 55.22 $\pm$ 52.94     | 2                      | 71                     | 79                 |
|           | Strider | 56                     | 55.95 $\pm$ 27.88     | 27                     | 112                    | 691                |
|           | Taemane | 28                     | 18.45 $\pm$ 8.52      | 23                     | 115                    | 244                |
| Permanent | Archer  | 133                    | 69.86 $\pm$ 56.23     | 5                      | 86                     | 269                |
|           | Artemis | 67                     | 6.42 $\pm$ 0.00       | 1                      | 60                     | 140                |
|           | BLiNG   | 456                    | 80.59 $\pm$ 33.49     | 7                      | 95                     | 625                |
|           | Kizuna  | 388                    | 84.18 $\pm$ 29.48     | 10                     | 97                     | 491                |
|           | Koffie  | 149                    | 48.29 $\pm$ 34.66     | 3                      | 154                    | 326                |
|           | Petra   | 10                     | 23.47 $\pm$ 0.00      | 1                      | 94                     | 103                |
|           | Spyker  |                        |                       |                        | 71                     | 79                 |
|           | Strider | 509                    | 60.79 $\pm$ 38.13     | 8                      | 112                    | 691                |
|           | Taemane | 94                     | 13.38 $\pm$ 9.73      | 2                      | 115                    | 244                |
